# Supplementary material for: Public perspectives on AI diagnosis of mental illness
Source: HighWire-hosted journal article supplement (doi:10.1136/gpsych-2023-101370), 2024-05-22
Supplement: gpsych-2023-101370supp001_data_supplement.pdf [file gpsych-2023-101370supp001_data_supplement.pdf]

## Vignettes

### Condition: AI\_Major Depressive Disorder

Dr Smith is a mental health professional who has taken on a new client, Morgan. Morgan is a 35-year-old office-worker who has felt very low and flat for the past six months. Despite feeling constant fatigue, Morgan often experiences sleepless nights. Morgan is finding it difficult to concentrate at work and believes the whole office is talking about this poor job performance. Morgan has taken many unauthorized sick days and received a caution from HR as a result. Morgan describes losing interest in previously enjoyable activities and withdrawing from relationships. In conversation, Dr Smith finds that Morgan's movements seem agitated and Morgan's speech is sometimes difficult to follow.

Dr Smith gives Morgan a wristband that records Morgan's physical activity, sleep and speech patterns. The data from the wristband are analysed by an artificial intelligence (AI) tool that assists with the diagnosis of psychiatric disorder. The AI works through an algorithm that matches different disorders to distinct patterns of language, motion and sleep/wake cycles. Dr Smith reviews the results of the AI analysis and produces a diagnosis of Major Depressive Disorder.

### Condition: AI\_Schizophrenia Spectrum Disorder

Dr Smith is a mental health professional who has taken on a new client, Morgan. Morgan is a 35-year-old office-worker who has felt very low and flat for the past six months. Despite feeling constant fatigue, Morgan often experiences sleepless nights. Morgan is finding it difficult to concentrate at work and believes the whole office is talking about this poor job performance. Morgan has taken many unauthorized sick days and received a caution from HR as a result. Morgan describes losing interest in previously enjoyable activities and withdrawing from relationships. In conversation, Dr Smith finds that Morgan's movements seem agitated and Morgan's speech is sometimes difficult to follow.

Dr Smith gives Morgan a wristband that records Morgan's physical activity, sleep and speech patterns. The data from the wristband are analysed by an artificial intelligence (AI) tool that assists with the diagnosis of psychiatric disorder. The AI works through an algorithm that matches different disorders to distinct patterns of language, motion and sleep/wake cycles. Dr Smith reviews the results of the AI analysis and produces a diagnosis of Schizophrenia Spectrum Disorder.

### Condition: DSM\_Major Depressive Disorder

Dr Smith is a mental health professional who has taken on a new client, Morgan. Morgan is a 35-year-old office-worker who has felt very low and flat for the past six months. Despite feeling constant fatigue, Morgan often experiences sleepless nights. Morgan is finding it difficult to concentrate at work and believes the whole office is talking about this poor job performance. Morgan has taken many unauthorized sick days and received a caution from HR as a result. Morgan describes losing interest in previously enjoyable activities and withdrawing from relationships. In conversation, Dr Smith finds that Morgan's movements seem agitated and Morgan's speech is sometimes difficult to follow.

Dr Smith conducts a clinical interview that assesses Morgan's physical activity, sleep and speech patterns. The interview is guided by the Diagnostic and Statistical Manual of Mental Disorders (DSM-5), a manual that assists with the diagnosis of psychiatric disorder. The DSM-5 works by listing the criteria (type, number and duration of symptoms) associated with different disorders. Dr Smith evaluates Morgan's symptoms against DSM-5 criteria and produces a diagnosis of Major Depressive Disorder.

**Condition: DSM\_Schizophrenia Spectrum Disorder**

Dr Smith is a mental health professional who has taken on a new client, Morgan. Morgan is a 35-year-old office-worker who has felt very low and flat for the past six months. Despite feeling constant fatigue, Morgan often experiences sleepless nights. Morgan is finding it difficult to concentrate at work and believes the whole office is talking about this poor job performance. Morgan has taken many unauthorized sick days and received a caution from HR as a result. Morgan describes losing interest in previously enjoyable activities and withdrawing from relationships. In conversation, Dr Smith finds that Morgan's movements seem agitated and Morgan's speech is sometimes difficult to follow.

Dr Smith conducts a clinical interview that assesses Morgan's physical activity, sleep and speech patterns. The interview is guided by the Diagnostic and Statistical Manual of Mental Disorders (DSM-5), a manual that assists with the diagnosis of psychiatric disorder. The DSM-5 works by listing the criteria (type, number and duration of symptoms) associated with different disorders. Dr Smith evaluates Morgan's symptoms against DSM-5 criteria and produces a diagnosis of Schizophrenia Spectrum Disorder.
